# Supplementary material for: The variations of VP1 protein might be associated with nervous system symptoms caused by enterovirus 71 infection
Source: PubMed Central journal article supplement (PMC4101859; doi:10.1186/1471-2334-14-243), 2014-05-07
Supplement: 1471-2334-14-243-S1.pdf [file 1471-2334-14-243-S1.pdf]

## Supplementary Table 1.

Table 1. the accession number and genotype of sequences included for analysis

| NS-EV71 group                          | First author | reference                            |
|----------------------------------------|--------------|--------------------------------------|
| AB213618-C2-983-Yamagata-99-1999-Japan | Mizuta K     | J Clin Microbiol. 2005;43(12):6171-5 |
| AB550334-B3-SK-EV006-org-1997-Malaysia | Miyamura K   | J Gen Virol. 2011;92(Pt 2):287-9     |
| AB550336-B4-C7/Osaka-org-1997-Japan    | Miyamura K   | J Gen Virol. 2011;92(Pt 2):287-9     |
| AF009523-B2-7962-PA-87-1987-USA        | Brown BA     | J Virol. 1999;73(12):9969-75         |
| AF009525-B2-1410-CA-86-1986-USA        | Brown BA     | J Virol. 1999;73(12):9969-75         |
| AF009526-B2-8102-WA-87-1987-USA        | Brown BA     | J Virol. 1999;73(12):9969-75         |
| AF009527-B2-1413-CA-87-1987-USA        | Brown BA     | J Virol. 1999;73(12):9969-75         |
| AF009539-B2-2219-IA-87-1987-USA        | Brown BA     | J Virol. 1999;73(12):9969-75         |
| AF009542-C1-2246-NY-87-1987-USA        | Brown BA     | J Virol. 1999;73(12):9969-75         |
| AF009546-C1-2264-CA-94-1994-USA        | Brown BA     | J Virol. 1999;73(12):9969-75         |
| AF009549-C1-0915-MA-87-1987-USA        | Brown BA     | J Virol. 1999;73(12):9969-75         |
| AF135883-B1-2604-AUS-74-1974-Japan     | Brown BA     | J Virol. 1999;73(12):9969-75         |
| AF135884-B1-2605-AUS-74-1974-AUS       | Brown BA     | J Virol. 1999;73(12):9969-75         |
| AF135885-B1-2608-AUS-74-1974-AUS       | Brown BA     | J Virol. 1999;73(12):9969-75         |
| AF135886-B1-2609-AUS-74-1974-AUS       | Brown BA     | J Virol. 1999;73(12):9969-75         |
| AF135893-B2-4224-MA-82-1982-USA        | Brown BA     | J Virol. 1999;73(12):9969-75         |
| AF135895-B2-4599-OR-83-1983-USA        | Brown BA     | J Virol. 1999;73(12):9969-75         |
| AF135899-B-6658-COL-94-1994-USA        | Brown BA     | J Virol. 1999;73(12):9969-75         |
| AF135938-C1-2261-CA-91-1991-USA        | Brown BA     | J Virol. 1999;73(12):9969-75         |
| AF135940-C1-2263-CA-94-1994-USA        | Brown BA     | J Virol. 1999;73(12):9969-75         |
| AF135948-C2-2642-AUS-95-1995-AUS       | Brown BA     | J Virol. 1999;73(12):9969-75         |
| AF135950-C2-2814-MO-98-1998-USA        | Brown BA     | J Virol. 1999;73(12):9969-75         |
| AF136379-C2-NCKU9822-1998-taiwan       | Yan JJ       | J Clin Virol. 2000;17(1):13-22       |
| AF304458-C2-Tainan/4643/98-1998-taiwan | Yan JJ       | J Med Virol. 2001;65(2):331-9        |
| AF376065-B4-SB1647/SAR/00-2000-MAL     | McMinn P     | J Virol. 2001;75(16):7732-8          |
| AF376105-B3-4F/AUS/4/99-1999-AUS       | McMinn P     | J Virol. 2001;75(16):7732-8          |
| AF376106-C2-5M/AUS/5/99-1999-AUS       | McMinn P     | J Virol. 2001;75(16):7732-8          |
| AF376109-C2-8M/AUS/6/99-1999-AUS       | McMinn P     | J Virol. 2001;75(16):7732-8          |
| AF376110-C2-9F/AUS/6/99-1999-AUS       | McMinn P     | J Virol. 2001;75(16):7732-8          |
| AF376111-B4-2027/SIN/01-2001-SIN       | McMinn P     | J Virol. 2001;75(16):7732-8          |
| AF376116-B3-3526/SIN/98-1998-SIN       | McMinn P     | J Virol. 2001;75(16):7732-8          |
| AF376125-B4-5769/SIN/00-2000-SIN       | McMinn P     | J Virol. 2001;75(16):7732-8          |
| AY125969-C3-KOR-EV71-05-2000-KOR       | Cardosa MJ   | Emerg Infect Dis. 2003;9(4):461-8    |
| AY125970-C3-KOR-EV71-06-2000-KOR       | Cardosa MJ   | Emerg Infect Dis. 2003;9(4):461-8    |
| AY125971-C3-KOR-EV71-07-2000-KOR       | Cardosa MJ   | Emerg Infect Dis. 2003;9(4):461-8    |
| AY125972-C3-KOR-EV71-08-2000-KOR       | Cardosa MJ   | Emerg Infect Dis. 2003;9(4):461-8    |
| AY125976-C3-KOR-EV71-13-2000-KOR       | Cardosa MJ   | Emerg Infect Dis. 2003;9(4):461-8    |
| AY207630-C1-0808-MAA-98-1998-MAL       | Herrero LJ   | Arch Virol. 2003;148(7):1369-85      |
| AY207639-B3-0245-MAA-97-1997-MAL       | Herrero LJ   | Arch Virol. 2003;148(7):1369-85      |
| AY207642-B3-0899-MAA-97-1997-MAL       | Herrero LJ   | Arch Virol. 2003;148(7):1369-85      |

---

|                                                |            |                                  |
|------------------------------------------------|------------|----------------------------------|
| AY207643-B4-0898-MAA-97-MAL                    | Herrero LJ | Arch Virol. 2003;148(7):1369-85  |
| AY207646-B4-0414-MAA-97-1997-MAL               | Herrero LJ | Arch Virol. 2003;148(7):1369-85  |
| AY207648-B3-0903-MAA-97-1997-MAL               | Herrero LJ | Arch Virol. 2003;148(7):1369-85  |
| DQ133458-C4-984-2004-taiwan                    | Li R       | PLoS One. 2011;6(10):e26237.     |
| DQ133459-C4-1235-2004-taiwan                   | Li R       | PLoS One. 2011;6(10):e26237.     |
| DQ341357-C2-7F/AUS/6/99-1999-AUS               | Li R       | PLoS One. 2011;6(10):e26237.     |
| DQ341366-B4-SB2864/SAR/00-2000-MAL             | Li R       | PLoS One. 2011;6(10):e26237.     |
| DQ341367-B3-MY821-3-SAR-97-1997-MAL            | Li R       | PLoS One. 2011;6(10):e26237.     |
| ETU22521-A-Brccr-1974-USA                      | Li R       | PLoS One. 2011;6(10):e26237.     |
| ETU22522-B2-MS/7423/87-1987-USA                | Li R       | PLoS One. 2011;6(10):e26237.     |
| EU364841-B3-26M/AUS/4/99-1999-Australia        | Li R       | PLoS One. 2011;6(10):e26237.     |
| EU414333-C1-CSF-CH-06-2006-Switzerland         | Cordey S   | PLoS Pathog. 2012;8(7):e1002826. |
| EU753365-C4a-518-03F/SD/CHN/07-2007-China      | Zhang Y    | J Clin Virol. 2009;44(4):262-7   |
| EU753369-C4a-521-04T/SD/CHN/07-2007-China      | Zhang Y    | J Clin Virol. 2009;44(4):262-7   |
| EU753375-C4a-521-18S/SD/CHN/07-2007-China      | Zhang Y    | J Clin Virol. 2009;44(4):262-7   |
| EU753397-C4a-523-05T/SD/CHN/07-2007-China      | Zhang Y    | J Clin Virol. 2009;44(4):262-7   |
| EU753407-C4a-TC03F/SD/CHN/07-2007-China        | Zhang Y    | J Clin Virol. 2009;44(4):262-7   |
| EU753409-C4a-TC08F/SD/CHN/07-2007-China        | Zhang Y    | J Clin Virol. 2009;44(4):262-7   |
| GQ231925-B5-TW/1101/08-2008-taiwan             | Chang SC   | J Med Virol. 2012;84(6):931-9    |
| GQ231926-C4-TW/1956/05-2005-taiwan             | Chang SC   | J Med Virol. 2012;84(6):931-9    |
| GQ231928-C4-TW/2639/04-2004-taiwan             | Chang SC   | J Med Virol. 2012;84(6):931-9    |
| GQ231929-C4-TW/2728/04-2004-taiwan             | Chang SC   | J Med Virol. 2012;84(6):931-9    |
| GQ231937-C4-TW/71428/05-2005                   | Chang SC   | J Med Virol. 2012;84(6):931-9    |
| GQ231939-C4-TW/71595/04-2004                   | Chang SC   | J Med Virol. 2012;84(6):931-9    |
| GQ231941-B5-TW/96002/08-2008-taiwan            | Chang SC   | J Med Virol. 2012;84(6):931-9    |
| GQ231942-B5-TW/96016/08-2008-taiwan            | Chang SC   | J Med Virol. 2012;84(6):931-9    |
| GQ231943-B5-TW/96022/08-2008-taiwan            | Chang SC   | J Med Virol. 2012;84(6):931-9    |
| GQ994988-C4-Anhui1-09-China-2009-China         | Chang GH   | Virus Res. 2010;151(1):66-73.    |
| GQ994992-C4-Henan2-09-China-2009-China         | Chang GH   | Virus Res. 2010;151(1):66-73.    |
| GU196833-C4-Henan1-09-China-2009-China         | Chang GH   | Virus Res. 2010;151(1):66-73.    |
| HQ828086-C4-NBChina01-2010-China               | Zhang YC   | Pathol Int. 2012;62(8):565-70.   |
| JN544418-C2-4643-TW98-1998-taiwan              | Huang SW   | Virology. 2012;422(1):132-43     |
| JQ742001-C4b-AFP2001064/EV71/GX/CHN/2001-China |            | GenBank                          |
| JQ742002-C4b-AFP2001071/EV71/GX/CHN/2001-China |            | GenBank                          |
| JX244185-C4-SDLY96-2009-China                  | Wen HL     | Virol J. 2013;10:115             |
| JX244186-C4-SDLY107-2010-China                 | Wen HL     | Virol J. 2013;10:115             |

nNS EV71 group

|                                         |          |                                      |
|-----------------------------------------|----------|--------------------------------------|
| AB177815-B5-2542-Yamagata-03-2003-Japan | Mizuta K | J Clin Microbiol. 2005;43(12):6171-5 |
| AB177816-B5-2716-Yamagata-03-2003-Japan | Mizuta K | J Clin Microbiol. 2005;43(12):6171-5 |
| AB213638-C4-1530-Yamagata-03-2003-Japan | Mizuta K | J Clin Microbiol. 2005;43(12):6171-5 |
| AB213647-B5-2419-Yamagata-03-2003-Japan | Mizuta K | J Clin Microbiol. 2005;43(12):6171-5 |
| AB213648-B5-2933-Yamagata-03-2003-Japan | Mizuta K | J Clin Microbiol. 2005;43(12):6171-5 |
| AB213649-B5-2934-Yamagata-03-2003-Japan | Mizuta K | J Clin Microbiol. 2005;43(12):6171-5 |

---

---

|                                                  |            |                                      |
|--------------------------------------------------|------------|--------------------------------------|
| AB213650-B5-2972-Yamagata-03-2003-Japan          | Mizuta K   | J Clin Microbiol. 2005;43(12):6171-5 |
| AB550332-C2-1095-org-1997-japan                  | Miyamura K | J Gen Virol. 2011;92(Pt 2):287-9     |
| AB550338-C4-75-Yamagata-org-2003-japan           | Miyamura K | J Gen Virol. 2011;92(Pt 2):287-9     |
| AB550340-C1-KED005-org-1997-malaysia             | Miyamura K | J Gen Virol. 2011;92(Pt 2):287-9     |
| AF119796-C2-TW/2086/98-1998-taiwan               | Shih SR    | Virus Res. 2000;68(2):127-36.        |
| AF304457-C2-Tainan/5746/98-1998-Taiwan           | Yan JJ     | J Med Virol. 2001;65(2):331-9        |
| AF304459-C2-Tainan/6092/98-1998-taiwan           | Yan JJ     | J Med Virol. 2001;65(2):331-9        |
| AF352027-B4-Enterovirus_5666/sin/002209-2000-SIN | Singh S    | Microbiol Immunol. 2002;46(11):801-8 |
| AF376070-B4-CN0942/SAR/00-2000-MAL               | McMinn P   | J Virol. 2001;75(16):7732-8          |
| AF376071-B4-CN9502/SAR/00-2000-MAL               | McMinn P   | J Virol. 2001;75(16):7732-8          |
| AF376078-B3-MY860-3/SAR/97-1997-MAL              | McMinn P   | J Virol. 2001;75(16):7732-8          |
| AF376079-C1-S10822/SAR/98-1998-MAL               | McMinn P   | J Virol. 2001;75(16):7732-8          |
| AF376081-C1-S11051/SAR/98-1998-MAL               | McMinn P   | J Virol. 2001;75(16):7732-8          |
| AF376084-B4-S21082/SAR/00-2000-MAL               | McMinn P   | J Virol. 2001;75(16):7732-8          |
| AF376088-B3-10M/AUS/6/99-1999-AUS                | McMinn P   | J Virol. 2001;75(16):7732-8          |
| AF376120-C1-4575/SIN/98-1998-SIN                 | McMinn P   | J Virol. 2001;75(16):7732-8          |
| AF376122-B4-5536/SIN/00-2000-SIN                 | McMinn P   | J Virol. 2001;75(16):7732-8          |
| AM396584-C2-ENT/PM/SHA52-1997-MAL                | Chan YF    | BMC Microbiol.2006;6:74.             |
| AM396585-C2-ENT/PM/SHA71-1997-MAL                | Chan YF    | BMC Microbiol.2006;6:74.             |
| AM396586-B3-EV71/SAR/SHA66-1997-MAL              | Chan YF    | BMC Microbiol.2006;6:74.             |
| AM396588-B3-EV71/SAR/SHA63-1997-MAL              | Chan YF    | BMC Microbiol.2006;6:74.             |
| AY125966-C3-KOR-EV71-01-2000-KOR                 | Cardosa MJ | Emerg Infect Dis. 2003;9(4):461-8    |
| AY125967-C3-KOR-EV71-02-2000-KOR                 | Cardosa MJ | Emerg Infect Dis. 2003;9(4):461-8    |
| AY125968-C3-KOR-EV71-3-2000-KOR                  | Cardosa MJ | Emerg Infect Dis. 2003;9(4):461-8    |
| AY125973-C3-KOR-EV71-09-2000-KOR                 | Cardosa MJ | Emerg Infect Dis. 2003;9(4):461-8    |
| AY125974-C3-KOR-EV71-10-2000-KOR                 | Cardosa MJ | Emerg Infect Dis. 2003;9(4):461-8    |
| AY125975-C3-KOR-EV71-11-2000-KOR                 | Cardosa MJ | Emerg Infect Dis. 2003;9(4):461-8    |
| AY207611-C2-03907-MAA-97-1997-MAL                | Herrero LJ | Arch Virol. 2003;148(7):1369-85      |
| AY207612-C1-03784-MAA-97-1997-MAL                | Herrero LJ | Arch Virol. 2003;148(7):1369-85      |
| AY207613-B4-03300-MAA-97-1997-MAL                | Herrero LJ | Arch Virol. 2003;148(7):1369-85      |
| AY207614-B3-0870-MAA-97-1997-MAL                 | Herrero LJ | Arch Virol. 2003;148(7):1369-85      |
| AY207615-C2-03750-MAA-97-1997-MAL                | Herrero LJ | Arch Virol. 2003;148(7):1369-85      |
| AY207616-B3-0473-MAA-97-1997-MAL                 | Herrero LJ | Arch Virol. 2003;148(7):1369-85      |
| AY207617-B4-0778-MAA-00-1997-MAL                 | Herrero LJ | Arch Virol. 2003;148(7):1369-85      |
| AY207618-C1-0807-MAA-00-2000-MAL                 | Herrero LJ | Arch Virol. 2003;148(7):1369-85      |
| AY207619-C1-0836-MAA-00-2000-MAL                 | Herrero LJ | Arch Virol. 2003;148(7):1369-85      |
| AY207620-C1-0915-MAA-00-2000-MAL                 | Herrero LJ | Arch Virol. 2003;148(7):1369-85      |
| AY207621-C1-0937-MAA-00-2000-MAL                 | Herrero LJ | Arch Virol. 2003;148(7):1369-85      |
| AY207622-C1-0948-MAA-00-2000-MAL                 | Herrero LJ | Arch Virol. 2003;148(7):1369-85      |
| AY207623-B4-0042-MAA-00-1997-MAL                 | Herrero LJ | Arch Virol. 2003;148(7):1369-85      |
| AY207624-B4-0066-MAA-00-2000-MAL                 | Herrero LJ | Arch Virol. 2003;148(7):1369-85      |
| AY207625-C1-0113-MAA-00-2000-MAL                 | Herrero LJ | Arch Virol. 2003;148(7):1369-85      |
| AY207626-C1-0431-MAA-00-1997-MAL                 | Herrero LJ | Arch Virol. 2003;148(7):1369-85      |
| AY207627-B4-0467-MAA-00-2000-MAL                 | Herrero LJ | Arch Virol. 2003;148(7):1369-85      |

---

---

|                                                         |            |                                    |
|---------------------------------------------------------|------------|------------------------------------|
| AY207628-B4-03907-MAA-97-1997-MAL                       | Herrero LJ | Arch Virol. 2003;148(7):1369-85    |
| AY207629-C1-0838-MAA-99-1999-MAL                        | Herrero LJ | Arch Virol. 2003;148(7):1369-85    |
| AY207631-C1-0557-MAA-98-1998-MAL                        | Herrero LJ | Arch Virol. 2003;148(7):1369-85    |
| AY207632-C1-0832-MAA-00-2000-MAL                        | Herrero LJ | Arch Virol. 2003;148(7):1369-85    |
| AY207633-B5-0815-MAA-00-2000-MAL                        | Herrero LJ | Arch Virol. 2003;148(7):1369-85    |
| AY207634-C1-0774-MAA-00-2000-MAL                        | Herrero LJ | Arch Virol. 2003;148(7):1369-85    |
| AY207635-C1-05716-MAA-00-1997-MAL                       | Herrero LJ | Arch Virol. 2003;148(7):1369-85    |
| AY207636-B3-04716-MAA-97-1997-MAL                       | Herrero LJ | Arch Virol. 2003;148(7):1369-85    |
| AY207637-B4-0343-MAA-97-1997-MAL                        | Herrero LJ | Arch Virol. 2003;148(7):1369-85    |
| AY207638-C1-0283-MAA-97-1997-MAL                        | Herrero LJ | Arch Virol. 2003;148(7):1369-85    |
| AY207640-B4-0175-MAA-97-1997-MAL                        | Herrero LJ | Arch Virol. 2003;148(7):1369-85    |
| AY207641-B3-0036-MAA-97-1997-MAL                        | Herrero LJ | Arch Virol. 2003;148(7):1369-85    |
| AY207644-B3-0897-MAA-97-1997-MAL                        | Herrero LJ | Arch Virol. 2003;148(7):1369-85    |
| AY207645-B3-0884-MAA-97-1997-MAL                        | Herrero LJ | Arch Virol. 2003;148(7):1369-85    |
| AY207647-B4-0128-MAA-97-1997-MAL                        | Herrero LJ | Arch Virol. 2003;148(7):1369-85    |
| AY207650-B4-0919-MAA-99-1999-MAL                        | Herrero LJ | Arch Virol. 2003;148(7):1369-85    |
| DQ341354-B3-3799/SIN/98-1998-SIN                        | McMinn P   | J Virol. 2001;75(16):7732-8        |
| DQ341358-C1-S40221/SAR/00-2000-MAL                      | McMinn P   | J Virol. 2001;75(16):7732-8        |
| DQ341359-C1-S10862/SAR/98-1998-MAL                      | McMinn P   | J Virol. 2001;75(16):7732-8        |
| DQ341361-C1-1M/AUS/12/00-2000-AUS                       | McMinn P   | J Virol. 2001;75(16):7732-8        |
| DQ341364-B5-5511/SIN/00-2000-SIN                        | McMinn P   | J Virol. 2001;75(16):7732-8        |
| DQ452074-C1-804/NO/03-healthy_child-2003-Norway         | McMinn P   | J Virol. 2001;75(16):7732-8        |
| EU753366-C4a-519-02F/SD/CHN/07-2007-China               | Zhang Y    | J Clin Virol. 2009;44(4):262-7     |
| EU753372-C4a-522-04T/SD/CHN/07-2007-China               | Zhang Y    | J Clin Virol. 2009;44(4):262-7     |
| EU753378-C4a-521-23F/SD/CHN/07-2007-China               | Zhang Y    | J Clin Virol. 2009;44(4):262-7     |
| EU753379-C4a-521-25F/SD/CHN/07-2007-China               | Zhang Y    | J Clin Virol. 2009;44(4):262-7     |
| EU753384-C4a-522-04T/SD/CHN/07-2007-China               | Zhang Y    | J Clin Virol. 2009;44(4):262-7     |
| EU753398-C4a-523-07T/SD/CHN/07-2007-China               | Zhang Y    | J Clin Virol. 2009;44(4):262-7     |
| EU753417-C4a-TC23F/SD/CHN/07-2007-China                 | Zhang Y    | J Clin Virol. 2009;44(4):262-7     |
| EU812515-C4-FY23-2008-China                             | Wang LC    | Virol Sin. 2010;25(2):98-106       |
| FJ439769-C4-Fuyang-0805-2008-China                      | Wu Z       | J Virol Methods. 2009;159(2):233-8 |
| FJ606447-C4-BJ08-Z004-3-2008-China                      | Ding NZ    | Virus Res. 2009;145(1):157-61.     |
| FJ606448-C4-BJ08-Z011-4-2008-China                      | Ding NZ    | Virus Res. 2009;145(1):157-61.     |
| FJ607334-C4-1/SHENZHEN/08/China/HFMD/2008-China         | Yu Z       | Arch Virol. 2013;158(5):1071-7     |
| FJ607335-C4-4/SHENZHEN/08/China/HFMD/2008-China         |            | Genbank                            |
| FJ607336-C4-28/SHENZHEN/08/China/HFMD/2008-China        |            | Genbank                            |
| FJ828519-C4-BJ08-2008-China                             | Mao Q      | PLoS One. 2012;7(9):e46043         |
| GQ121418-C4a-EV71/Fuyang.Anhui.P.R.C/17.08/5-2008-China | Zhang Y    | Virol J. 2010;7:94.                |
| GQ231927-C4-TW/2429/04-2004-taiwan                      | Chang SC   | J Med Virol. 2012;84(6):931-9      |
| GQ231930-C4-TW/2815/04-2004-taiwan                      | Chang SC   | J Med Virol. 2012;84(6):931-9      |
| GQ231931-C4-TW/2824/04-2004-taiwan                      | Chang SC   | J Med Virol. 2012;84(6):931-9      |
| GQ231932-C4-TW/2871/04-2004-taiwan                      | Chang SC   | J Med Virol. 2012;84(6):931-9      |
| GQ231933-C4-TW/70516/08-2008-taiwan                     | Chang SC   | J Med Virol. 2012;84(6):931-9      |
| GQ231935-B5-TW/70886/08-2008-taiwan                     | Chang SC   | J Med Virol. 2012;84(6):931-9      |

---

---

|                                                 |          |                                   |
|-------------------------------------------------|----------|-----------------------------------|
| GQ231936-B5-TW/70902/08-2008-taiwan             | Chang SC | J Med Virol. 2012;84(6):931-9     |
| GQ231940-C4-TW/72232/04-2004-taiwan             | Chang SC | J Med Virol. 2012;84(6):931-9     |
| GQ994989-C4-Chongqing1-09-China-2009-China      | Chang GH | Virus Res. 2010;151(1):66-73.     |
| GQ994990-C4-Chongqing2-09-China-2009-China      | Chang GH | Virus Res. 2010;151(1):66-73.     |
| GQ994991-C4-Chongqing3-09-China-2009-China      | Chang GH | Virus Res. 2010;151(1):66-73.     |
| HM037793-C4-GD08-EV71-039-2008-China            | Sun LM   | Jpn J Infect Dis. 2011;64(1):13-8 |
| HM037797-C4-GD08-EV71-194-2008-China            | Sun LM   | Jpn J Infect Dis. 2011;64(1):13-8 |
| HM037798-C4-GD08-EV71-274-2008-China            | Sun LM   | Jpn J Infect Dis. 2011;64(1):13-8 |
| HM037799-C4-GD08-EV71-274-2008-China            | Sun LM   | Jpn J Infect Dis. 2011;64(1):13-8 |
| HM037802-C4-GD08-EV71-495-2008-China            | Sun LM   | Jpn J Infect Dis. 2011;64(1):13-8 |
| HM037806-C4-GD08-EV71-614-2008-China            | Sun LM   | Jpn J Infect Dis. 2011;64(1):13-8 |
| HQ129932-C4-BJ06-SJS06-healthy_child-2006-China | Li R     | PLoS One. 2011;6(10):e26237.      |
| HQ882182-C4-FY0805-2008-China                   | Liu J    | Virol J. 2011 Oct 27;8:483.       |
| JX025561-C4-FY7VP5/AH/CHN/2008-China            |          | Genbank                           |
| JX244182-C4-SDLY1-2008-China                    | Wen HL   | Virol J. 2013;10:115              |
| JX244183-C4-SDLY11-2008-China                   | Wen HL   | Virol J. 2013;10:115              |
| JX244184-C4-SDLY48-2008-China                   | Wen HL   | Virol J. 2013;10:115              |

---

**Supplementary Table 2**

**Table 2.** Genotype and subgenotype distribution of EV71 strains from different countries

| Country     | NS or<br>nNS | A | B  |    |    |    |    | C  |    |    |    |
|-------------|--------------|---|----|----|----|----|----|----|----|----|----|
|             |              |   | B1 | B2 | B3 | B4 | B5 | C1 | C2 | C3 | C4 |
| Malaysia    | NS           |   |    |    | 5  | 4  |    | 1  |    |    |    |
|             | nNS          |   |    |    | 9  | 13 | 1  | 19 | 4  |    |    |
| Austria     | NS           |   | 4  |    | 2  |    |    |    | 5  |    |    |
|             | nNS          |   |    |    | 1  |    |    | 1  |    |    |    |
| Singapore   | NS           |   |    |    | 1  | 2  |    |    |    |    |    |
|             | nNS          |   |    |    | 1  | 2  | 1  | 1  |    |    |    |
| USA         | NS           | 1 |    | 8  |    |    |    | 5  | 1  |    |    |
| Taiwan      | NS           |   |    |    |    |    | 4  |    | 3  |    | 7  |
|             | nNS          |   |    |    |    |    | 2  |    | 3  |    | 6  |
| Japan       | NS           |   |    |    |    | 1  |    | 1  |    |    |    |
|             | nNS          |   |    |    |    |    | 6  | 1  |    |    | 2  |
| China       | NS           |   |    |    |    |    |    |    |    |    | 14 |
|             | nNS          |   |    |    |    |    |    |    |    |    | 31 |
| Korea       | NS           |   |    |    |    |    |    |    |    | 5  |    |
|             | nNS          |   |    |    |    |    |    |    |    | 6  |    |
| Switzerland | NS           |   |    |    |    |    |    | 1  |    |    |    |
| Norway      | nNS          |   |    |    |    |    |    | 1  |    |    |    |

Note: AF135899 strain is not included because it belongs to none of the subgenotypes.

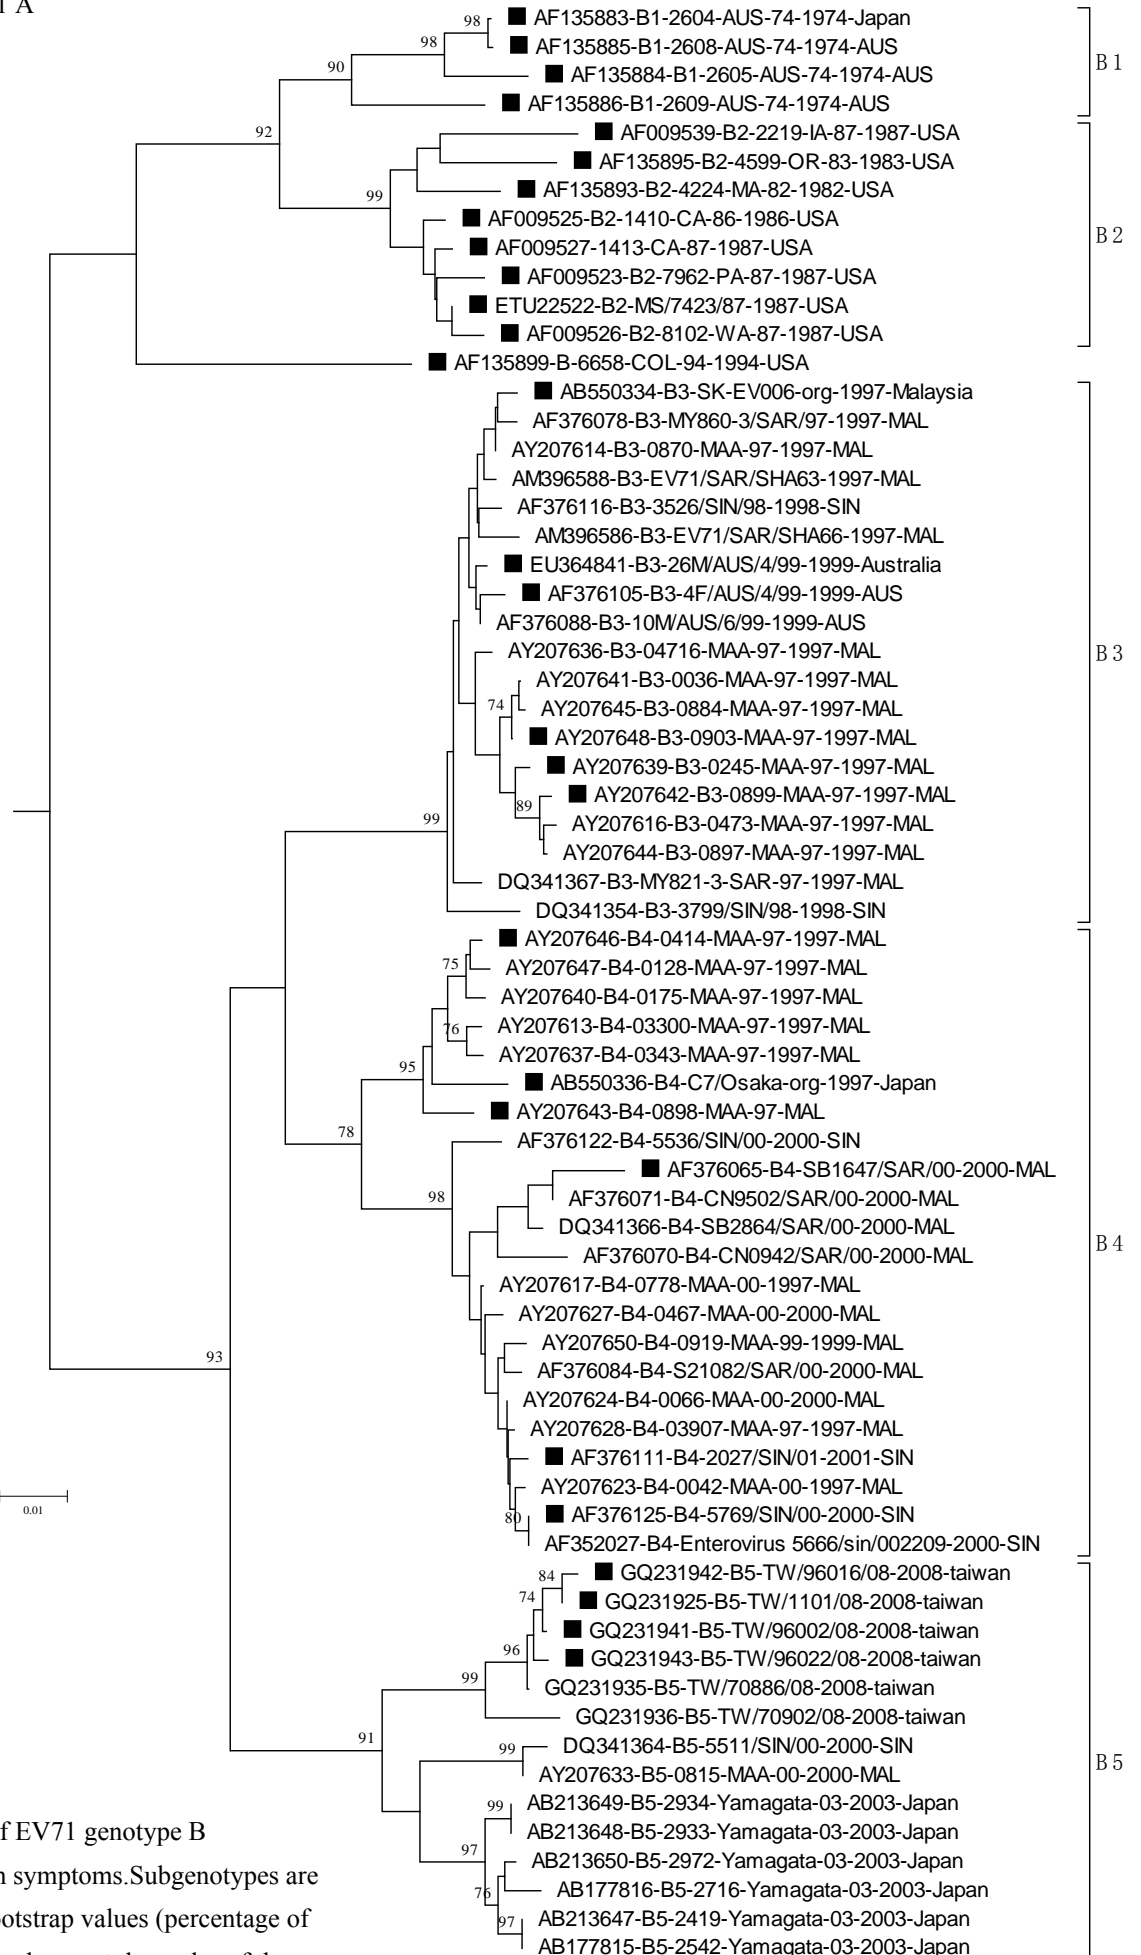

Fig.1A phylogenetic tree of EV71 genotype B  
 ■ NS, with nervous system symptoms. Subgenotypes are shown on the right, and bootstrap values (percentage of 1,000 pseudoreplicates) are shown at the nodes of the major clades.

Supplementary Fig.1 B

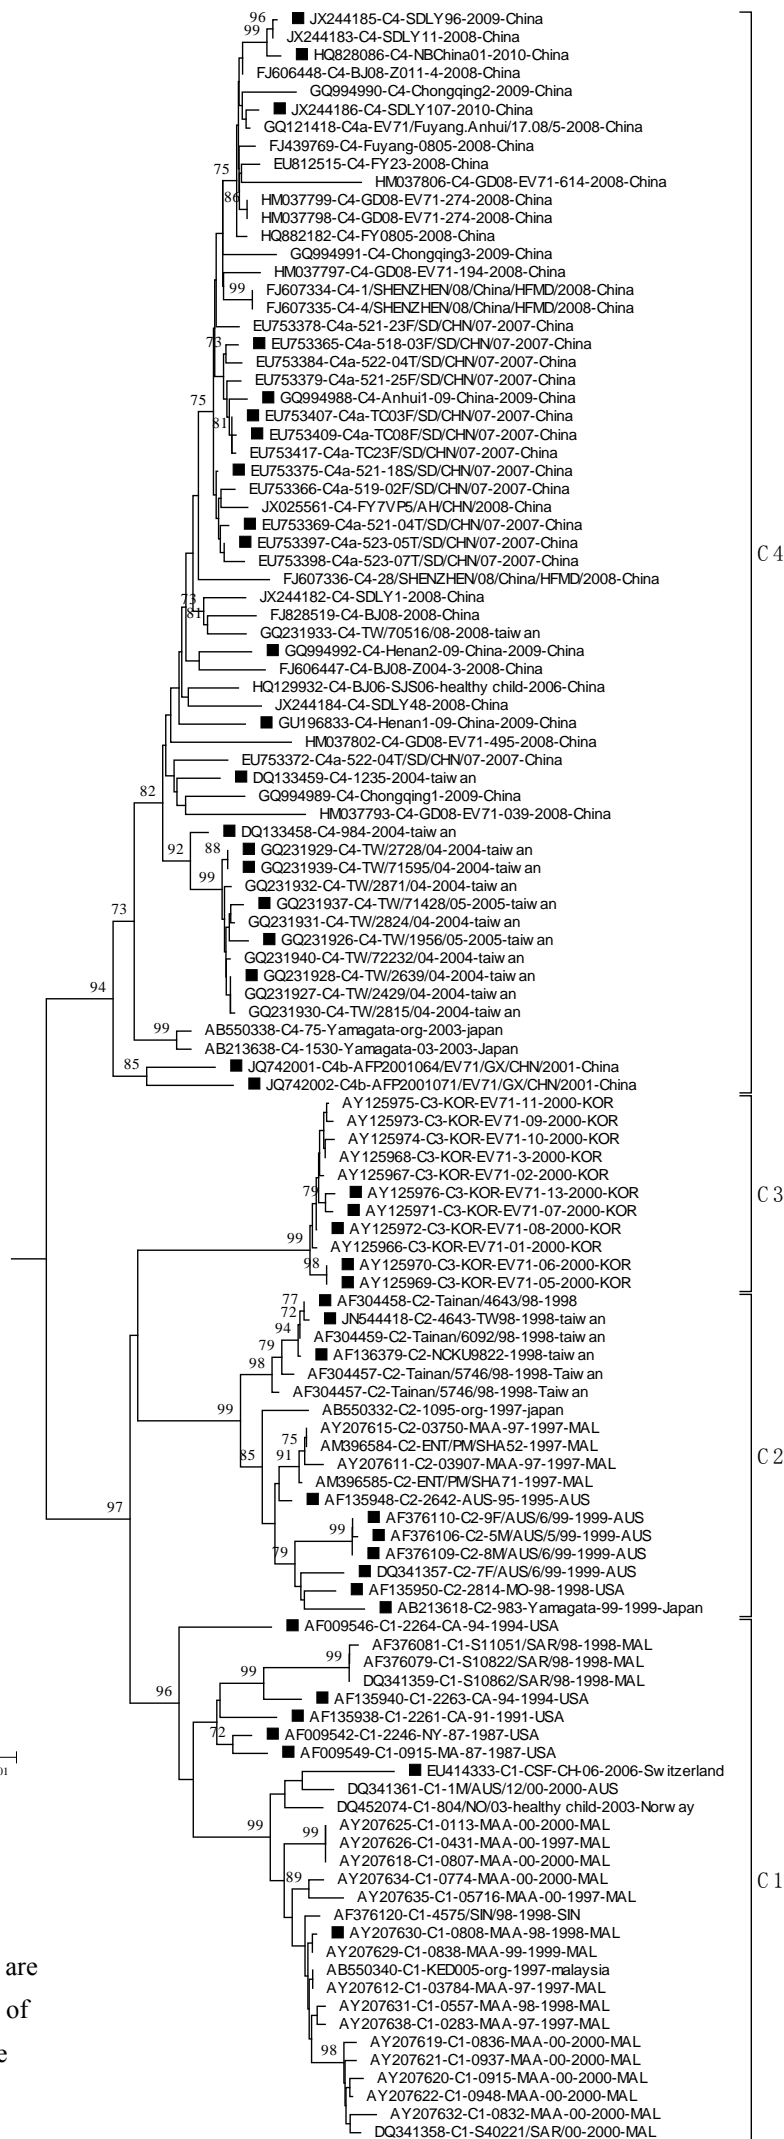

Fig.1B phylogenetic tree of EV71 genotype C

■ NS, with nervous system symptoms. Subgenotypes are shown on the right, and bootstrap values (percentage of 1,000 pseudoreplicates) are shown at the nodes of the major clades.
